# Supplementary material
Source: PubMed Central journal article supplement (PMC3706178)
Supplement: DS_10.1177_0022034513490167.pdf [file DS_10.1177_0022034513490167.pdf]

## ORIGINAL REPORT

# Longitudinal Analyses of Early Lesions by Fluorescence: An Observational Study

A. Ferreira Zandoná<sup>1\*</sup>, M. Ando<sup>1</sup>, G.F. Gomez<sup>1</sup>, M. Garcia-Corretjer<sup>2</sup>, G.J. Eckert<sup>3</sup>, E. Santiago<sup>4</sup>, B.P. Katz<sup>3</sup>, and D.T. Zero<sup>1</sup>

## APPENDIX

**Appendix Table 1.**

Characteristics of Lesions Based on Race, Gender, Baseline ICDAS Scores, and Baseline QLF Values

|                               |          | All              | Progressed       | Not Progressed   |
|-------------------------------|----------|------------------|------------------|------------------|
| <b>Age Mean (SD) (yrs)</b>    |          | <b>9.7 (2.0)</b> | <b>9.4 (2.2)</b> | <b>9.8 (1.9)</b> |
| <b>Ethnicity in %</b>         | Hispanic | 90               | 86               | 92               |
|                               | White    | 76               | 70               | 78               |
| <b>Gender in %</b>            | Female   | 53               | 59               | 49               |
| <b>Baseline ICDAS in %</b>    | Unrupted | 17               | 11               | 20               |
|                               | 0        | 54               | 39               | 62               |
|                               | 1-I      | 4                | 7                | 3                |
|                               | 1-A      | 9                | 10               | 8                |
|                               | 2-I      | <1               | 1                | 0                |
|                               | 2-A      | 11               | 21               | 6                |
|                               | 3        | 4                | 11               | 1                |
|                               | 4        | 1                | 1                | 1                |
| <b>Baseline QLF Mean (SD)</b> | Area     | 3.5 (7.8)        | 5.1 (5.6)        | 2.5 (3.9)        |
|                               | ΔF       | 12.5 (6.5)       | 16.3 (7.0)       | 10.3 (4.9)       |
|                               | ΔQ       | 58.8 (104.6)     | 101.5 (134.6)    | 33.6 (70.8)      |

DOI: 10.1177/0022034513490167. <sup>1</sup>Department of Preventive and Community Dentistry, Indiana University School of Dentistry, Indianapolis, USA; <sup>2</sup>Graduate Endodontics, Saint Louis University, Missouri, USA; <sup>3</sup>Department of Biostatistics, Indiana University School of Medicine and Richard M. Fairbanks School of Public Health, Indianapolis, USA; and <sup>4</sup>Research Center, University of Puerto Rico School of Dental Medicine, San Juan; \*corresponding author, aZandoná@iu.edu

**Appendix Table 2.** Baseline QLF Mean (SE) Values for Area,  $\Delta F$ , and  $\Delta Q$  According to Surface and Baseline ICDAS Scores

| Surface | ICDAS* | Area      | $\Delta F$ | $\Delta Q$  |
|---------|--------|-----------|------------|-------------|
| B       | 0      | 1.2 (0.3) | 11.8 (0.4) | 18.6 (6.7)  |
|         | 1-A    | 1.2 (0.3) | 11.8 (0.5) | 17.4 (7.8)  |
|         | 1-I    | 1.3 (0.4) | 11.9 (0.6) | 19.1 (8.7)  |
|         | 2-A    | 1.3 (0.3) | 12.3 (0.5) | 20.0 (8.0)  |
|         | 2-I    | 1.5 (0.4) | 12.4 (0.7) | 21.3 (9.6)  |
|         | 3      | 1.9 (0.6) | 14.2 (1.0) | 38.6 (14.7) |
|         | 4      | 1.1 (1.6) | 19.7 (3.0) | 30.6 (39.3) |
| L       | 0      | 1.3 (0.3) | 12.6 (0.4) | 25.7 (7.4)  |
|         | 1-A    | 1.2 (0.4) | 11.8 (0.6) | 22.0 (9.6)  |
|         | 1-I    | 1.4 (0.4) | 12.7 (0.6) | 26.8 (9.3)  |
|         | 2-A    | 1.3 (0.4) | 14.4 (0.7) | 29.1 (9.9)  |
|         | 2-I    | 1.4 (0.5) | 13.9 (0.9) | 28.8 (12.4) |
|         | 3      | 1.3 (0.7) | 15.3 (1.3) | 26.6 (18)   |
|         | 4      | 1.3 (1.6) | 9.2 (3.0)  | 22.0 (39.4) |
| O       | 0      | 5.2 (0.2) | 13.4 (0.3) | 89.6 (4.6)  |
|         | 1-A    | 5.5 (0.2) | 14.2 (0.3) | 92.7 (4.7)  |
|         | 1-I    | 5.7 (0.2) | 14.9 (0.3) | 103.2 (5.0) |
|         | 2-A    | 6.2 (0.2) | 16.4 (0.3) | 119.5 (4.7) |
|         | 2-I    | 6.1 (0.3) | 16.3 (0.6) | 116.1 (8.0) |
|         | 3      | 6.7 (0.2) | 18.5 (0.3) | 144.6 (4.9) |
|         | 4      | 6.8 (0.2) | 18.6 (0.4) | 157.1 (5.8) |

**Appendix Table 3.**  
Regression Line Slopes for Area,  $\Delta F$ , and  $\Delta Q$  According to Surface and Baseline ICDAS Scores

|            |                | Surface      |        |         |          |          |       | Baseline ICDAS Score* |       |      |       |       |       |  |
|------------|----------------|--------------|--------|---------|----------|----------|-------|-----------------------|-------|------|-------|-------|-------|--|
|            |                | All Surfaces | Buccal | Lingual | Occlusal | Unrupted | Sound | 1-I                   | 1-A   | 2-I  | 2-A   | 3     | 4     |  |
| Area       | No Progression | 0.05         | 0.03   | 0.03    | 0.07     | 0.21     | 0.03  | -0.04                 | 0.05  |      | 0.12  | 0.08  | -0.06 |  |
|            | Progression    | 0.21         | 0.08   | 0.08    | 0.27     | 0.34     | 0.10  | 0.16                  | 0.31  | 0.26 | 0.35  | 0.21  |       |  |
| $\Delta F$ | No Progression | 0.19         | 0.10   | 0.15    | 0.24     | 0.48     | 0.14  | -0.09                 | 0.32  | -    | 0.30  | 0.21  | 0.22  |  |
|            | Progression    | 0.86         | 0.67   | 0.70    | 0.95     | 1.44     | 0.67  | 0.48                  | 1.18  | 1.00 | 0.93  | 0.52  |       |  |
| $\Delta Q$ | No Progression | 1.58         | 0.45   | 0.53    | 2.40     | 5.51     | 0.75  | -0.71                 | 2.89  | -    | 3.55  | 3.84  | 7.52  |  |
|            | Progression    | 10.40        | 2.91   | 3.50    | 14.08    | 13.09    | 4.37  | 4.77                  | 17.99 | 6.77 | 13.25 | 22.83 | 16.39 |  |
